# Supplementary material
Source: Elsevier journal article supplement (https://www.sciencedirect.com/science/article/pii/S1695403321001703)
Supplement: mmc1 [file S1695403321001703:mmc1.doc]

**MATERIAL Y MÉTODOS**

Estudio analítico, longitudinal, en el que se siguió a una cohorte de 207 neonatos, de los cuales, 59 presentaron hipoglucemia en algún momento de las primeras 8 horas de vida. 10 neonatos abandonaron el estudio por expreso deseo familiar. Criterios de inclusión: RN con EG entre 34+1 y 41+6 semanas, cuyas madres no hubieran recibido perfusiones de suero glucosado durante el parto. Se procedió a la determinación de glucosa con el glucómetro Stat Strip Xpress a las 2, 4 y 8 horas de vida (hdv). Se definió hipoglucemia global: <45 mg/dL, hipoglucemia moderada-grave (HMG): < 36 mg/dL, hipoglucemia grave (HG): < 18 mg/dL. Posteriormente se compararon distintas variables entre los pacientes hipoglucémicos y los que no presentaron dicha circunstancia. En los pacientes hipoglucémicos, no se realizó intervención, salvo que presentaran cifras menores a 25 mg/dL o fueran sintomáticos (insistiendo en la succión o administrando LM extraída o leche artificial o glucosa IV). Variables recogidas:

- Maternas: edad, nivel educativo, tóxicos, enfermedades pregestacionales, peso y talla.
- Gestacionales: ganancia ponderal, patología, gemelaridad, cultivo vaginorrectal.
- Nacimiento: características del líquido amniótico, amniorrexis, tipo de parto y anestesia.
- Perinatales: EG, sexo, peso, necesidad de reanimación, Apgar, contacto precoz maternofilial (piel con piel), succión al pecho (al nacimiento, a las 2, 4 y 8 hdv), tipo de alimentación.
- Valores analíticos: Niveles en sangre de arteria umbilical de glucosa, láctico y exceso de bases (EB).
- Postnatales: separación de los padres, habitación individual, ruido ambiental (valorado con un sonómetro en una escala de dB: leve <60, moderado: 60-80 y intenso: >80 dB), intensidad lumínica (1:oscuridad, 2: luz tenue: presencia de un foco lumínico alejado del RN, 3: luz intensa: existencia de dos focos lumínicos o un foco cuyo haz de luz estuviera dirigido directamente hacia el neonato), succión al pecho (en el momento del análisis o en los 30 minutos previos), posición del RN respecto a su madre en el momento de la determinación glucémica. Patología precoz (distrés respiratorio, sepsis, etc).

El cálculo del tamaño muestral se realizó con el programa Epidat 3.1. (se tuvo en cuenta una posible pérdida del 10%, potencia mínima del 80% e intervalo de confianza del 95%) y el análisis estadístico, con SPSS, versión 25.0. En la estadística descriptiva, las variables cualitativas se presentaron mediante distribución de frecuencias absolutas y porcentajes. Las cuantitativas, mediante mediana y rango intercuartílico. En el análisis bivariante, se utilizó pruebas de contraste de hipótesis. En el estudio multivariante, primero, se realizaron modelos de regresión logística simples, considerando como variable dependiente la hipoglucemia y como variables independientes las que mostraron diferencias estadísticamente significativas en el estudio bivariante. Posteriormente, se calculó el modelo de regresión logística para pronosticar la hipoglucemia (con la selección automática de variables o con la selección manual de las variables con diferencia estadísticamente significativa). Se controlaron factores de confusión y otros sesgos. El límite mínimo de significación aceptado fue del 95% (p<0,05).

Se han tenido en cuenta las normas deontológicas8,9, contando con la aprobación del Comité de Ética Regional. Todos los tutores legales de los participantes aceptaron y firmaron un documento de consentimiento informado.
